# Supplementary material for: High specific capacitance of a 3D-metal–organic framework-confined growth in CoMn2O4 nanostars as advanced supercapacitor electrode materials
Source: Royal Society of Chemistry journal article supplement (doi:10.1039/d1ta00900a), 2021-01-01
Supplement: d1ta00900a1.pdf [file d1ta00900a1.pdf]

## Supporting information

### **High specific capacitance of a 3D-metal–organic framework confined growth in $\text{CoMn}_2\text{O}_4$ nanostars as advanced supercapacitor electrode materials**

Reza Abazari,<sup>a</sup> Soheila Sanati,<sup>a</sup> Ali Morsali,<sup>\*,a</sup> and Deepak P. Dubal<sup>\*,b,c</sup>

<sup>a</sup>Department of Chemistry, Tarbiat Modares University, P.O. Box 14115-175, Tehran, Iran

<sup>b</sup>Centre for Materials Science, Queensland University of Technology (QUT), 2 George Street, Brisbane, QLD 4001, Australia

<sup>c</sup>School of Chemistry and Physics, Queensland University of Technology (QUT), 2 George Street, Brisbane, QLD 4001, Australia

---

\*E-mail: morsali\_a@modares.ac.ir (A. Morsali); deepak.dubal@qut.edu.au (D. P. Dubal).

**Materials and physical techniques.** All starting materials for the synthesis were purchased from commercial providers and used without further purification. FT-IR spectra were recorded using a Nicolet Fourier Transform IR 100 spectrometer in the 400-4000  $\text{cm}^{-1}$  range using the KBr disk technique. The thermal behavior of the samples was analyzed by a PL-STA 1500 apparatus working under a nitrogen atmosphere and at the heating rate of 10  $^{\circ}\text{C min}^{-1}$ . Powder X-ray diffraction (PXRD) measurements were performed using a Bruker AXS model D8 advanced with monochromated Cu-K $\alpha$  ( $\lambda=1.54056 \text{ \AA}$ ) radiation. The  $\text{N}_2$  adsorption/desorption isotherms were measured at 77 K using a Micromeritics ASAP 2020 analyzer. The specific surface area was calculated by the Brunauer-Emmett-Teller (BET) method. The inductively coupled plasma (ICP) analysis was performed on a Varian ICP-OES VISTA-PRO CCD instrument. A CHNS Thermo Scientific Flash 2000 elemental analyzer was used to analyze elemental contributions to the samples. Finally, melting points were measured on an Electrothermal 9100 apparatus.

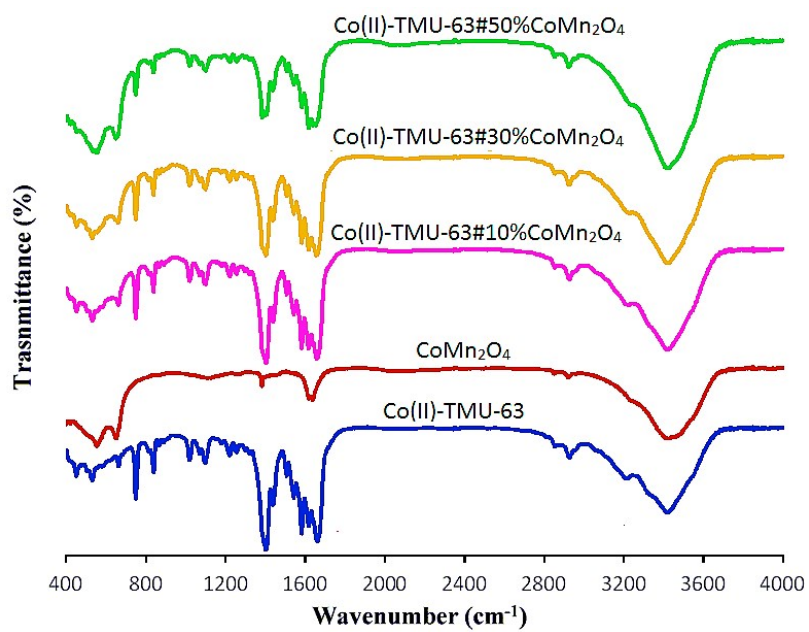

**Figure S1.** FT-IR spectra of the Co(II)-TMU-63, CoMn<sub>2</sub>O<sub>4</sub>, and Co(II)-TMU-63#XCoMn<sub>2</sub>O<sub>4</sub> (X= 10, 30, and %50) NCPs.

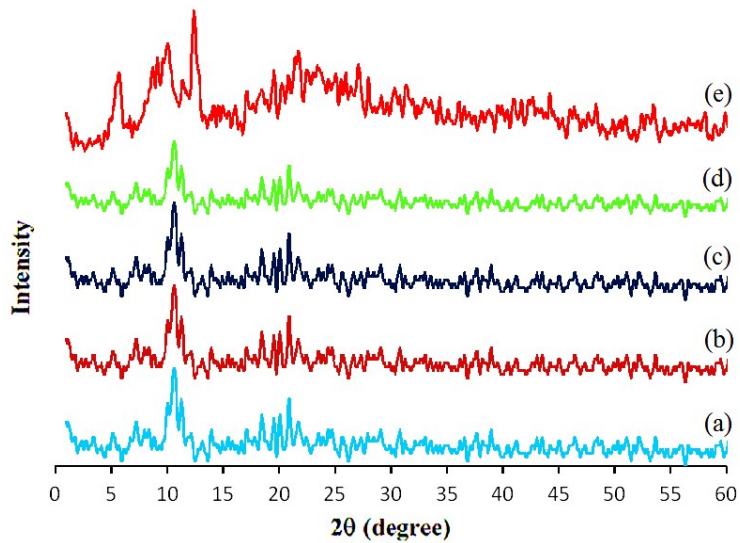

**Figure S2.** PXRD patterns of Co(II)-TMU-63 at different temperatures (a) 25 °C, (b) 100 °C, (c) 200 °C, (d) 300 °C, and (e) 350 °C.

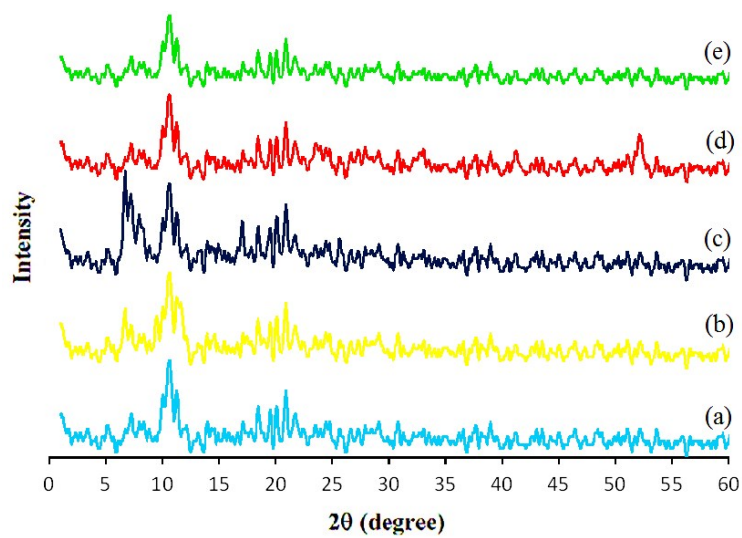

**Figure S3.** PXRD patterns of Co(II)-TMU-63 after refluxing for 24 h in different solvents (a) DMF, (b) acetonitrile, (c) *n*-hexane, (d) absolute ethanol, and (e) dimethyl sulfoxide.

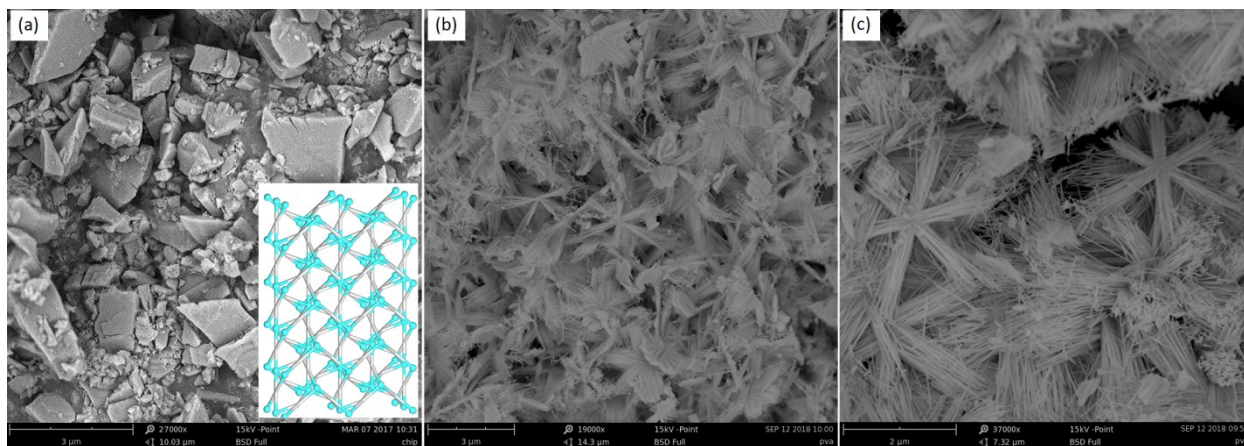

**Figure S4.** The FE-SEM images of (a) Co(II)-TMU-63, (b) Co(II)-TMU-63#10%CoMn<sub>2</sub>O<sub>4</sub> NCPs, and (c) Co(II)-TMU-63#50%CoMn<sub>2</sub>O<sub>4</sub> NCPs.

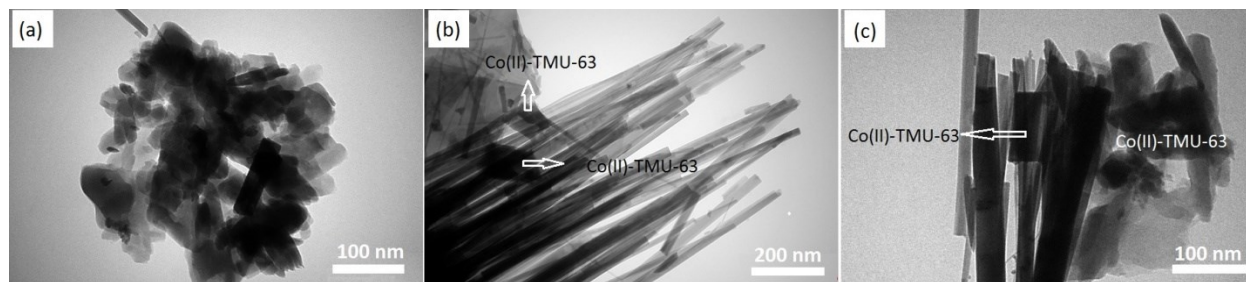

**Figure S5.** The TEM images of (a) Co(II)-TMU-63, (b) Co(II)-TMU-63#10%CoMn<sub>2</sub>O<sub>4</sub> NCPs, and (c) Co(II)-TMU-63#50%CoMn<sub>2</sub>O<sub>4</sub> NCPs.

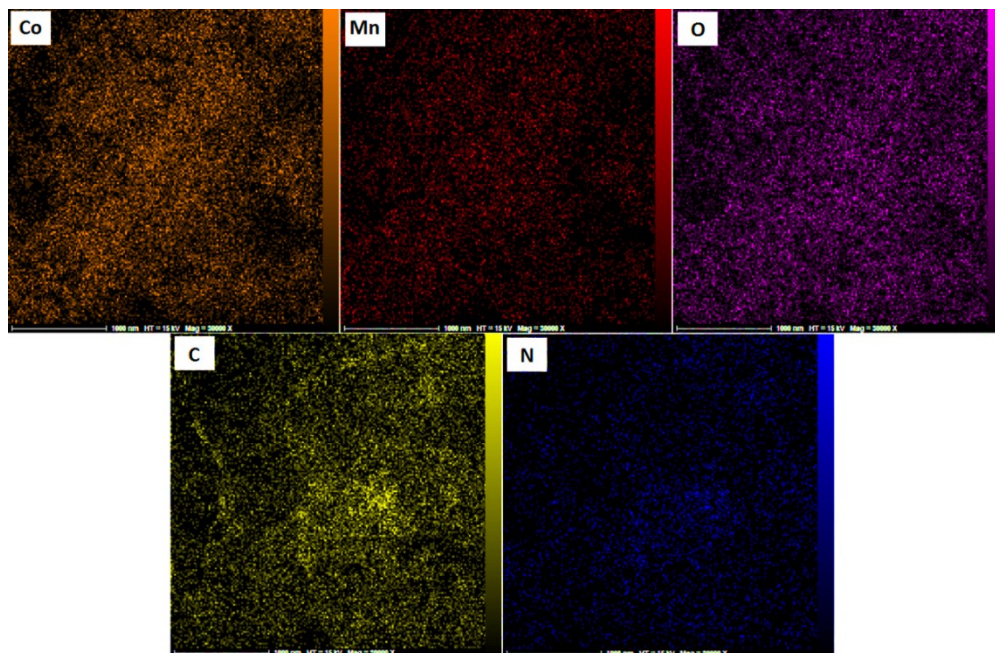

**Figure S6.** The elemental mapping of Co(II)-TMU-63#30%CoMn<sub>2</sub>O<sub>4</sub> NCPs.



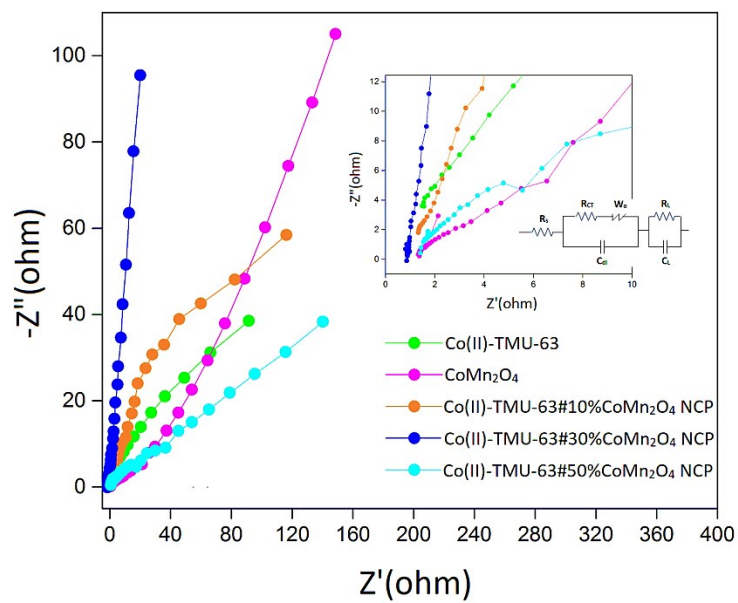

**Figure S7.** EIS Nyquist plots of electrode materials. Inset of figure including enlarged view of the Nyquist plots at high frequency range and the related circuit model.

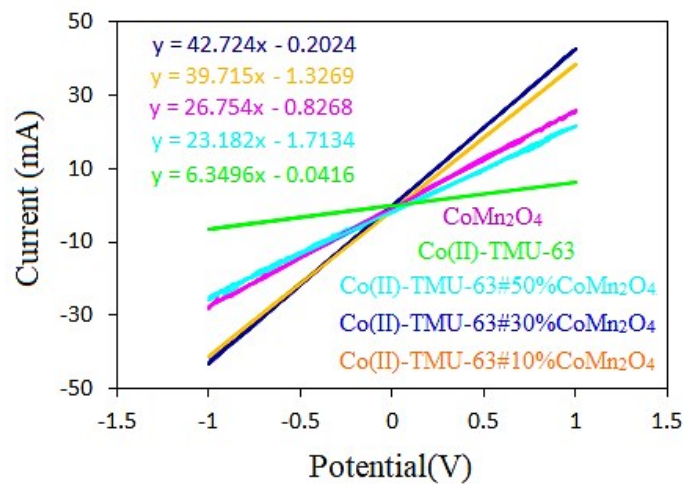

**Figure S8.** CV curves of electrode materials at a scan rate of 100mVs<sup>-1</sup>.

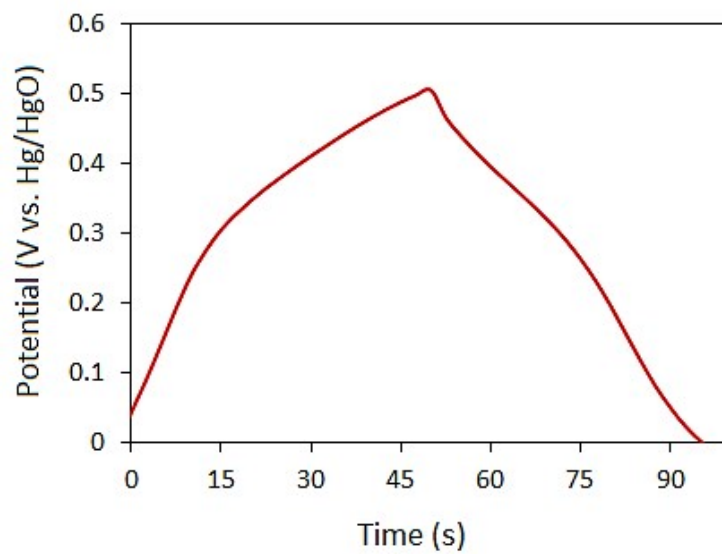

**Figure S9.** Charge-discharge curve of AC in a three electrode system.

**Table S1.**  $R_s$  and  $R_{ct}$  parameters obtained from EIS results for electrode materials.

| Electrode Material                          | $R_{CT}$ ( $\Omega$ ) | $R_s$ ( $\Omega$ ) |
|---------------------------------------------|-----------------------|--------------------|
| $\text{CoMn}_2\text{O}_4$                   | 0.3                   | 1.3                |
| Co(II)-TMU-63                               | 0.25                  | 1.3                |
| Co(II)-TMU-63#10% $\text{CoMn}_2\text{O}_4$ | 0.4                   | 1.1                |
| Co(II)-TMU-63#30% $\text{CoMn}_2\text{O}_4$ | —                     | 0.9                |
| Co(II)-TMU-63#50% $\text{CoMn}_2\text{O}_4$ | 0.95                  | 1.35               |
